# Supplementary material
Source: Springer Nature journal article supplement (https://www.springermedizin.de/resource/supplementary/13256_2011_2091_MOESM2_ESM.pdf/9648984)
Supplement: MOESM2 [file 9648984]

# Proteinuria over time in a case of fibrillary Glomerulonephritis

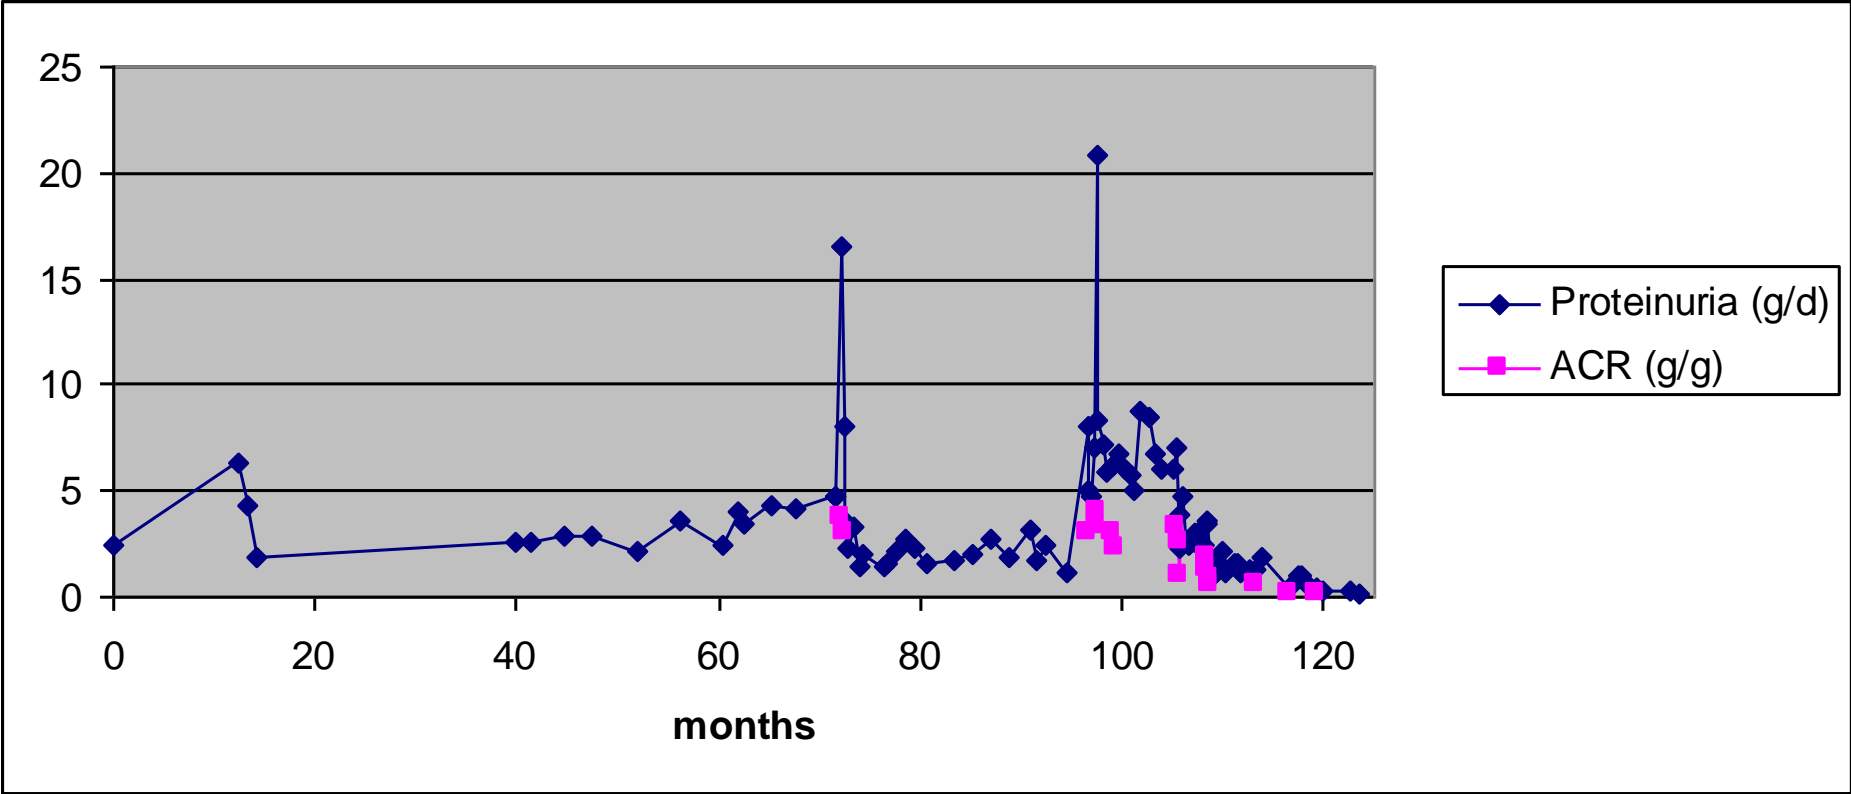

Prednisolone   
 Methylprednisolone   
 Mycophenolate mofetil   
 Rituximab   
 Plasmapheresis \* \* \*

\* \* \*
